# Supplementary material for: Determination of aflatoxin B1 by novel nanofiber-packed solid-phase extraction coupled with a high performance liquid chromatography-fluorescence detector
Source: Royal Society of Chemistry journal article supplement (doi:10.1039/d2ay01753a), 2022-12-23
Supplement: d2ay01753a1.pdf [file d2ay01753a1.pdf]

***Supplementary Information***

*for*

**Determination of aflatoxin B1 by novel nanofiber-packed solid-phase  
extraction coupled with High Performance Liquid Chromatography-  
Fluorescence Detector**

Yunzheng Wang<sup>a</sup>, Chen Hou<sup>a</sup>, Yuqi Dai<sup>a</sup>, Lanling Chu<sup>a,b,\*</sup>, Shiwei Geng<sup>c</sup>, Shenglan

Zheng<sup>c</sup>, Xuejun Kang<sup>b</sup>, and Zhongze Gu<sup>b</sup>

<sup>a</sup> School of Light Industry and Food Engineering, Nanjing Forestry University,  
Nanjing, 210037, China.

<sup>b</sup> School of Biological Science and Medical Engineering, Southeast University,  
Nanjing, 210096, China.

<sup>c</sup> Animal Products Quality Inspection and Test Center in Jiangsu Province, Nanjing,  
210036, China.

\*Corresponding author.

E-mail addresses: chu\_lanling@126.com (Lanling Chu)

## 1. Preparation of the spinning solution

1 g PS or PVP was dissolved in 10 ml of mixed solution of tetrahydrofuran (THF) and N,N-dimethylformamide (DMF) (6:4, v/v) to obtain 10% (w/v) PS solution; 0.5 g PS and 0.5 g AR were dissolved in the above mixed solution and stirred continuously using an electromagnetic stirrer until complete fusion to obtain 5% (w/v) PS-5% (w/v) AR solution; 0.5 g PS and 0.5 g PVP were dissolved in the above mixed solution, and stirring the two materials until completely dissolved to obtain 5% (w/v) PS-5% (w/v) PVP mixed solution.

## 2. Preparation of Packed-fiber SPE column

A fine wire with a diameter of 1 mm was used to fill the front end of the solid-phase extraction column with 12 mg of nanofibers, which needed to be dense and homogeneous and could be filled three times, and the prepared solid-phase extraction columns were then fixed to the solid-phase extraction apparatus, which provided pressure through an air pump to drive the sample solution through the columns. And the array device of extraction columns was shown in the Fig. S1

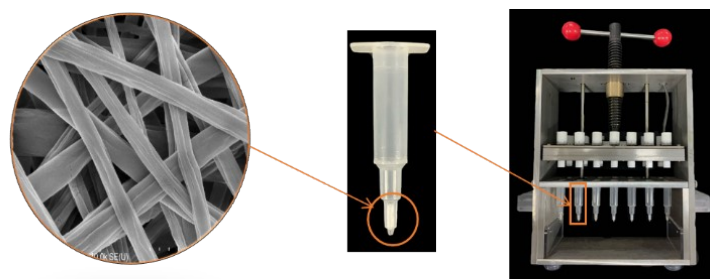

Fig. S1 Array device of 12 extraction columns

### **3. Preparation of 10 ng mL<sup>-1</sup> of AFB1 standard solution**

Weighed 1 mg of AFB1, dissolved in 100 mL of methanol, and mixed thoroughly to get 10 µg mL<sup>-1</sup> of standard stock solution. Pipetted 1 mL of the solution into a 100 mL volumetric flask and filled to 100 ng mL<sup>-1</sup> mixed standard working solution with methanol. Pipetted 1 mL of the solution into a 10 mL volumetric flask and adjusted the volume to the scale with water-methanol-acetonitrile solution (70:12:12, v/v/v), then mixed well to get 10 ng mL<sup>-1</sup> of AFB1 standard solution.

### **4. Sample derivation steps**

Heated the centrifuge tube with the collected eluate in a water bath to 50°C, then blowed dry with nitrogen. Removed the tube, added 60 µL hexane and 30 µL trifluoroacetic acid, vortexed and mixed, then placed it in the water bath at 40°C for 15 min for derivatization, then heated the tube to 50°C and used nitrogen to blow the liquid in the tube dry. Followed the preceding steps, 200 µL of the initial mobile phase solution was added to the centrifuge tube, mixed thoroughly, and passed through a 0.22 µm filter membrane before being collected and detected using an HPLC with a fluorescence detector.

### **References**

[1] R. Chen, Y. Y. Yang, B. Qu, Y. Li, Y. Lu, L. L. Tian and W. Y. Shen, *Anal. Chem.*, 2016, 408, 5499-5511.
